# Supplementary material for: Oxygen storage properties of hexagonal HoMnO3+δ
Source: Royal Society of Chemistry journal article supplement (doi:10.1039/c7cp03556j), 2017-01-01
Supplement: c7cp03556j1.pdf [file c7cp03556j1.pdf]

## Oxygen storage properties of hexagonal $\text{HoMnO}_{3+\delta}$

Konrad Świerczek<sup>a,b</sup>, Alicja Klimkowicz<sup>c,\*</sup>, Kengo Nishihara<sup>c</sup>, Shuntaro Kobayashi<sup>c</sup>, Akito Takasaki<sup>c</sup>, Maleeha Alanizy<sup>d</sup>, Stanislaw Kolesnik<sup>d</sup>, Bogdan Dabrowski<sup>d</sup>, Seungho Seong<sup>e</sup>, Jeongsoo Kang<sup>e</sup>

<sup>a</sup>AGH University of Science and Technology, Faculty of Energy and Fuels,

Department of Hydrogen Energy, al. A. Mickiewicza 30, 30-059 Krakow, Poland

<sup>b</sup>AGH Centre of Energy, AGH University of Science and Technology, ul. Czarnowiejska 36, 30-054 Krakow, Poland

<sup>c</sup>Shibaura Institute of Technology, Department of Engineering Science and Mechanics, 3-7-5 Toyosu, Koto-ku, 135-8548 Tokyo, Japan

E-mail: klimkowicz.alicja.ewa.j2@shibaura-it.ac.jp

<sup>d</sup>Department of Physics, Northern Illinois University, DeKalb, IL 60115, USA

<sup>e</sup>Department of Physics, The Catholic University of Korea (CUK), Bucheon 14662, Korea

## Supporting Information

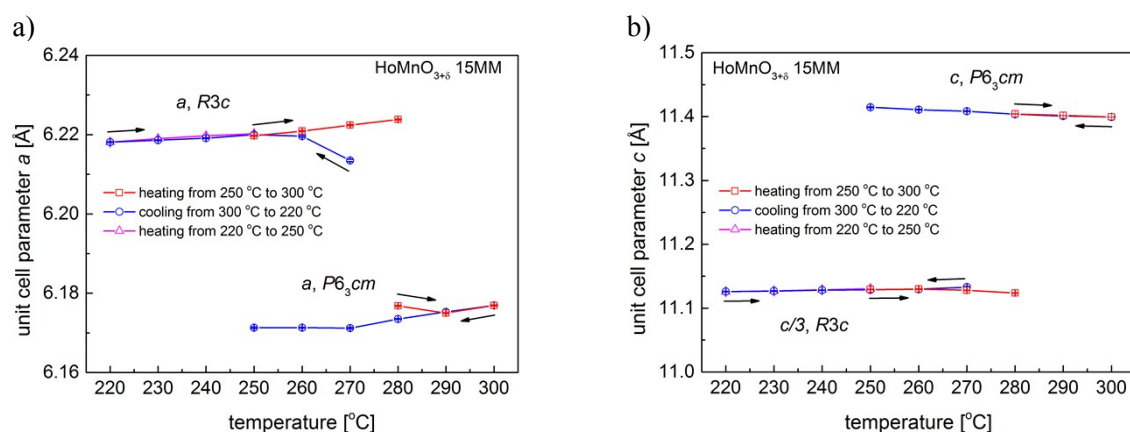

**Fig. S1.** Evolution of the unit cell parameters of the Hex0 ( $P6_3cm$ ) and Hex1 ( $R3c$ ) phases of the  $\text{HoMnO}_{3+\delta}$  15MM sample during sequence of the measurements heating, cooling and heating in the oxygen atmosphere for a) parameter  $a$ ; b) parameter  $c$ .

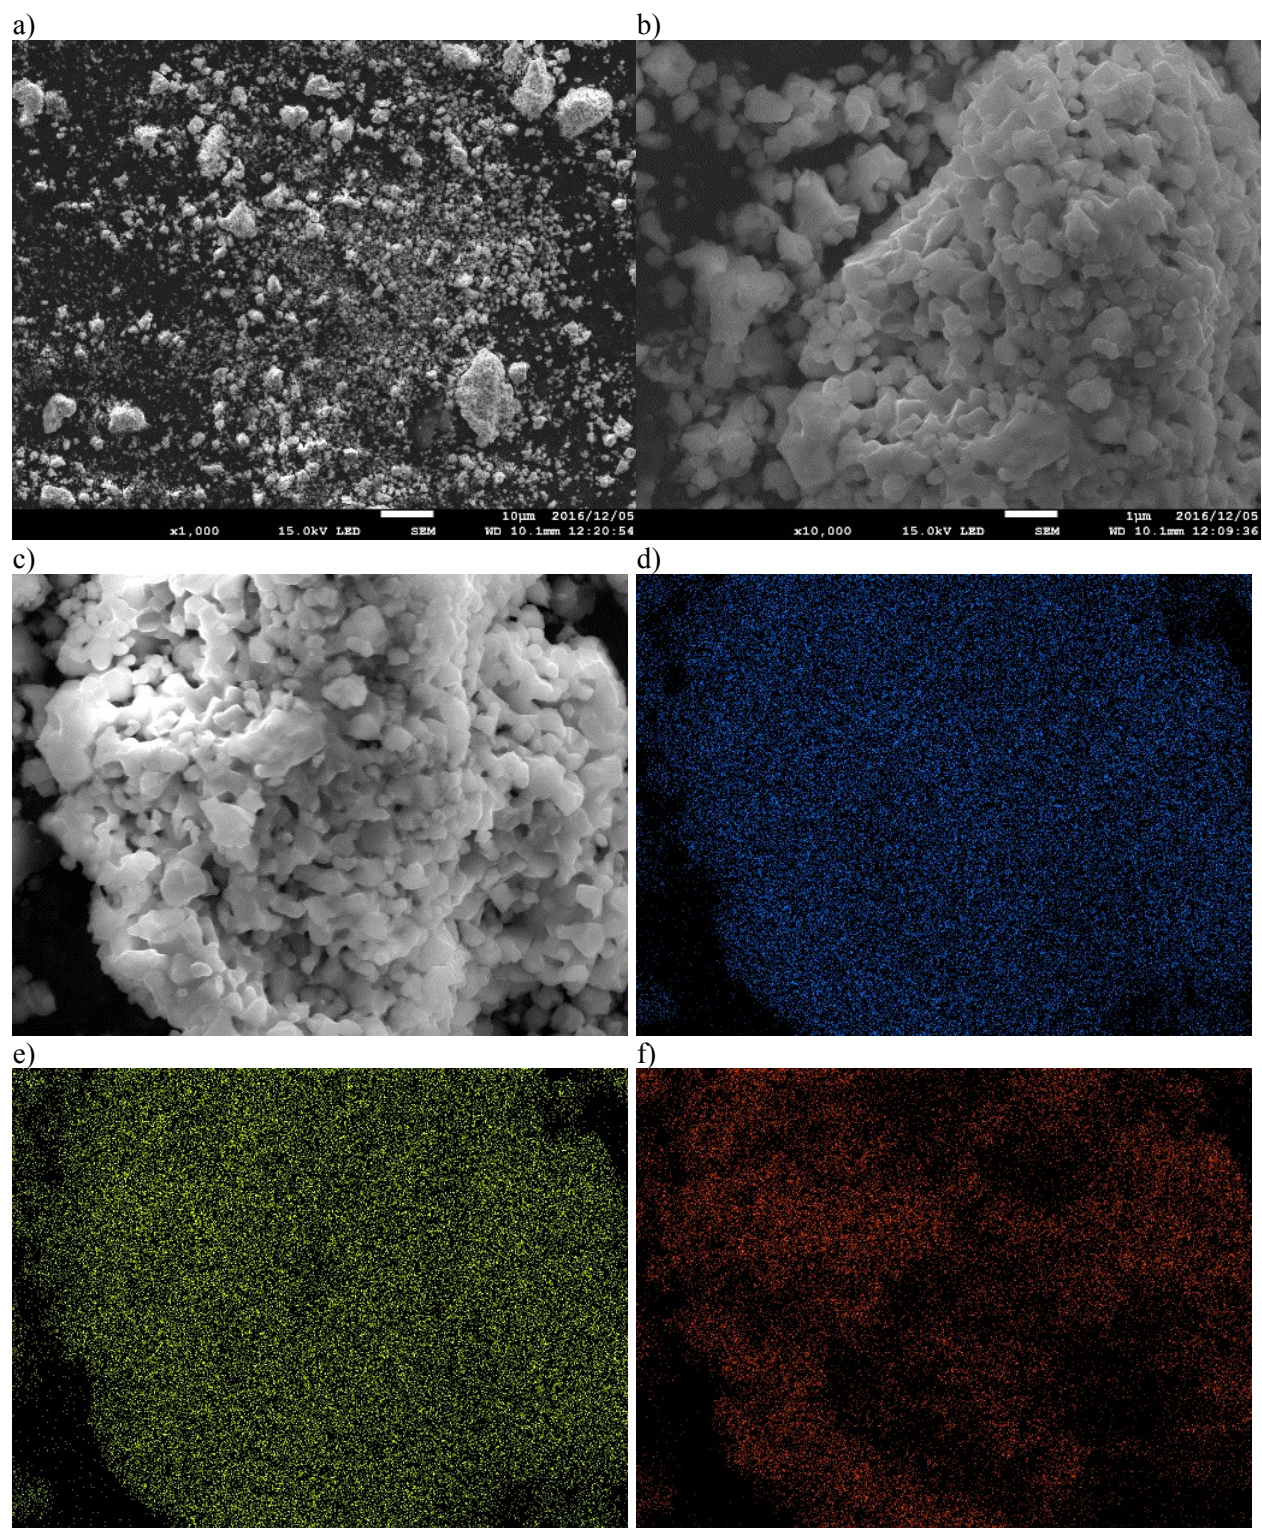

**Fig. S2.** Micrographs of the as prepared HoMnO<sub>3</sub> 0MM powder at different magnifications of a) 1000 and b) 10000. Elemental mappings registered for grain shown in c): d) Ho, e) Mn, f) O.

a) b)



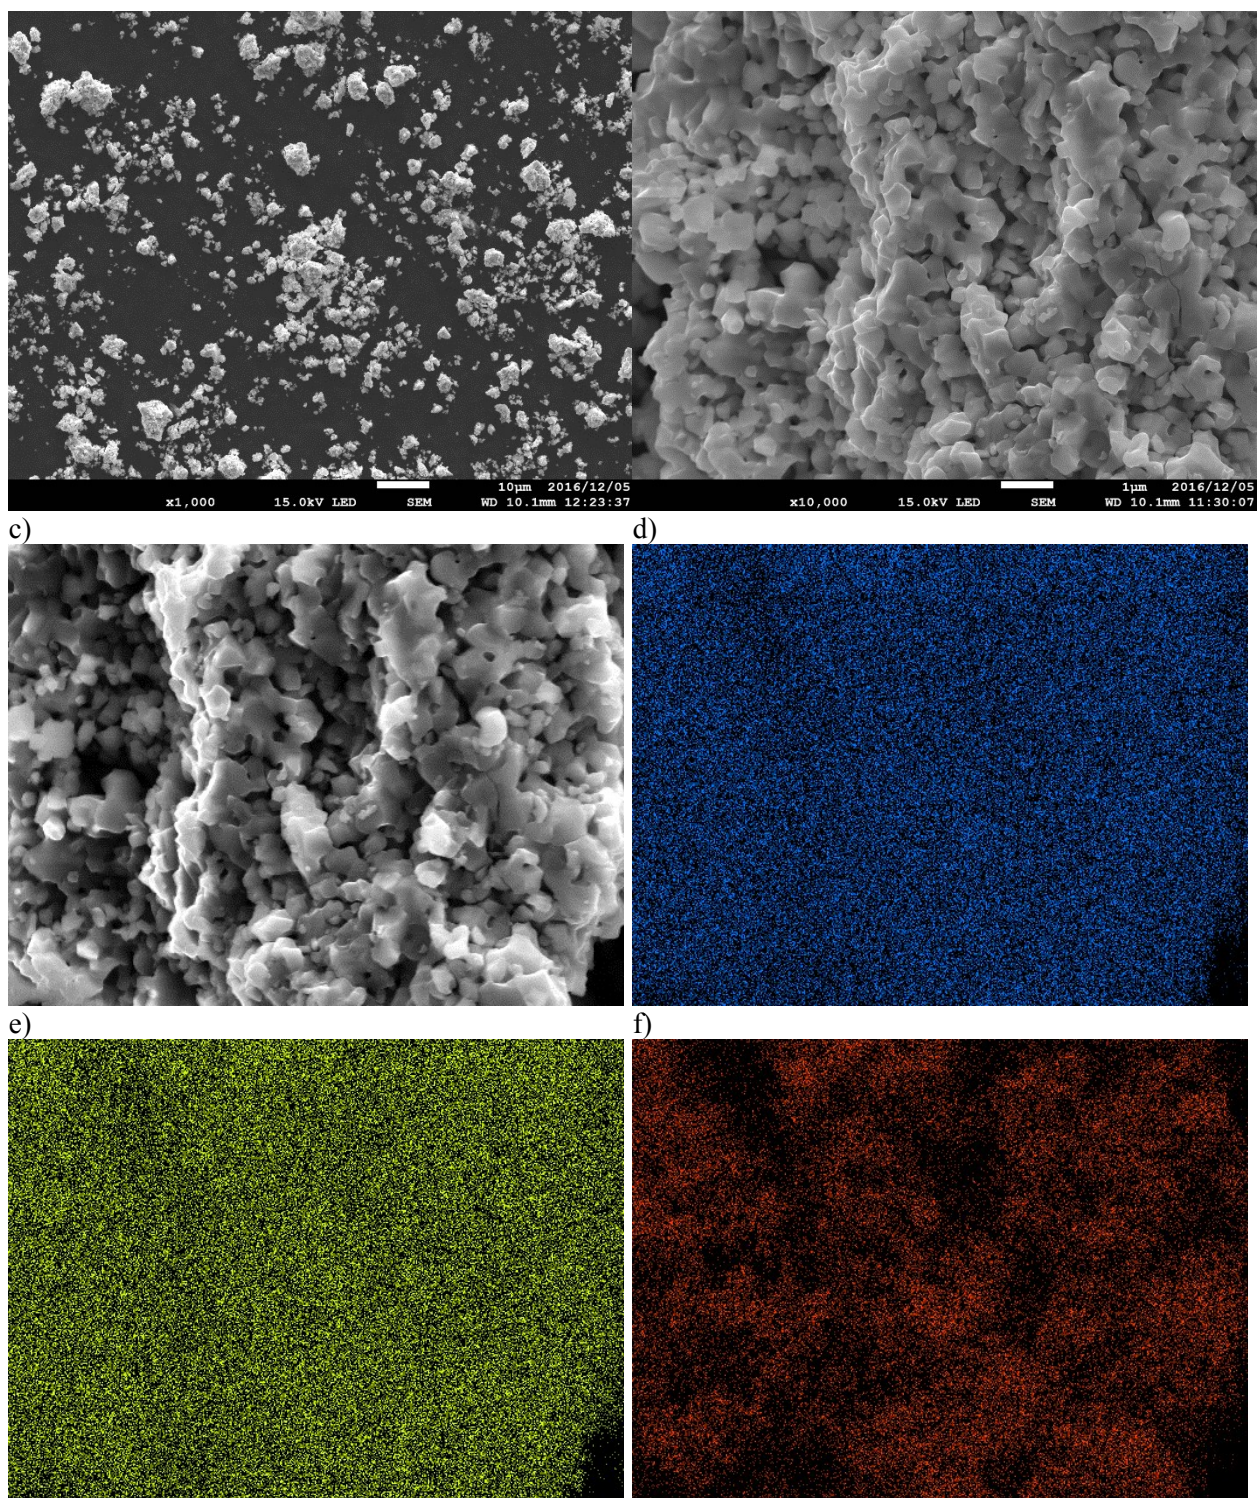

**Fig. S3.** Micrographs of the as prepared  $\text{HoMnO}_3$  15MM powder at different magnifications of a) 1000 and b) 10000. Elemental mappings registered for grain shown in c): d) Ho, e) Mn, f) O.

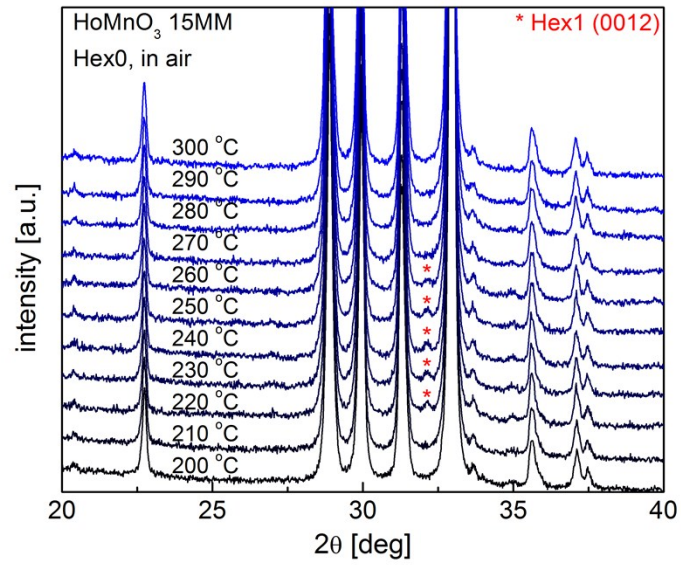

**Fig. S4.** Structural evolution of the  $\text{HoMnO}_3$  15MM material heated in the air atmosphere. Formation of the oxidized Hex1 ( $R3c$ ) phase is visible (denoted as 0012 Bragg peak).
